# Supplementary material for: Fluoranthene imide dimers with strong isomeric effects on the charge transport properties
Source: Royal Society of Chemistry journal article supplement (doi:10.1039/d4cp03245d), 2024-01-01
Supplement: d4cp03245d1.pdf [file d4cp03245d1.pdf]

## Supporting Information

### Fluoranthene Imide Dimers with Strong Isomeric Effects on the Charge Transport Properties

*Ting-Yu Wang,<sup>a#</sup> Huangcheng Liu,<sup>b#</sup> Miao Liu<sup>b#</sup>, Yen-Han Shih,<sup>a</sup> Xinyu Yu,<sup>b</sup> Yen-Han Shih,<sup>a</sup> Zhong'an Li,<sup>b\*</sup> and Chu-Chen Chueh<sup>a\*</sup>*

<sup>a</sup> Department of Chemical Engineering, National Taiwan University, Taipei, 10617, Taiwan

<sup>b</sup> Key Laboratory for Material Chemistry of Energy Conversion and Storage, Ministry of Education, Hubei Key Laboratory of Material Chemistry and Service Failure, School of Chemistry and Chemical Engineering, Huazhong University of Science and Technology, Wuhan, 430074, China

E-mails: cchueh@ntu.edu.tw; lizha@hust.edu.cn

#### Experimental section

1,4-Dioxane and *N,N*-Dimethylformamide were dried and distilled from sodium and calcium hydride, respectively, under an atmosphere of dry nitrogen before use. Compounds **1** and **3** were synthesized as previously reported.<sup>[1]</sup> Other reagents were purchased from Sigma-aldrich, TCI, Energy Chemical and general sources and all commercial materials were used as received without re-purification unless otherwise stated.

<sup>1</sup>H NMR and <sup>13</sup>C NMR spectra were recorded on Bruker Avance 600 MHz. Mass spectrometry was performed using a Bruker Daltonics instrument and Solarix 7.0T. High-resolution mass spectra were performed on Thermo Fisher Orbitrap Exploris 120 or Thermo Fisher Orbitrap LC/MS (Q Exactive). UV-Vis absorption spectra were performed on Perkin Elmer Lambda 750s spectrometer. Cyclic voltammetry (CV) was carried out in degassed CHCl<sub>3</sub> with BuN<sup>+</sup>PF<sub>6</sub><sup>-</sup> (0.1 mol/L) as electrolyte on a CHI600E electrochemical analyser (CH Instruments, Inc., China). A three-electrode system was used with Pt disc, Pt wire and Ag/AgCl as working, counter and reference electrodes, respectively. Thermogravimetric analysis (TGA) and differential scanning calorimetry (DSC) were investigated by TA instruments TGA Q500 and Perkin Elmer Pyris 1,

respectively, under a nitrogen atmosphere with a heating rate of 10 °C/min. Fluorescence spectra were measured using SHIMADZU RF-5301PC.

### Synthesis of compound 2

<sup>1</sup>H NMR (600 MHz, Chloroform-*d*) δ 8.32 (s, 1H, ArH), 8.27 (d, *J* = 7.8 Hz, 1H, ArH), 8.08 (d, *J* = 1.6 Hz, 1H, ArH), 8.02 (d, *J* = 7.2 Hz, 1H, ArH), 7.76 (d, *J* = 8.0 Hz, 1H, ArH), 7.63 (dd, *J* = 8.4, 1.8 Hz, 1H, ArH), 3.69 (d, *J* = 7.8 Hz, 2H, -N-CH<sub>2</sub>-), 2.01 – 1.92 (m, 1H, -CH-), 1.45 – 1.19 (m, 8H, -CH<sub>2</sub>-), 0.94 (t, *J* = 7.8 Hz, 3H, -CH<sub>3</sub>), 0.91 (t, *J* = 7.2 Hz, 3H, -CH<sub>3</sub>).

### Synthesis of F16

Compound **2** (200 mg, 0.42 mmol), hexamethylditin (67 mg, 0.21 mmol), Pd(PPh<sub>3</sub>)<sub>4</sub> (24 mg, 0.02 mmol), and 15 mL dry toluene were added to a round bottom flask under nitrogen atmosphere. The reaction was heated to 115 °C for 2 h. The reaction was cooled to room temperature and the solvent was removed under a reduced pressure. The crude product was purified through column chromatography (SiO<sub>2</sub>, PE/DCM, 2/1, V/V) to afford **F16** (70 mg, 41.9%) <sup>1</sup>H NMR (600 MHz, Chloroform-*d*) δ 8.34 (s, 2H, ArH), 8.25 (d, *J* = 7.2 Hz, 2H, ArH), 8.08 (s, 2H, ArH), 8.01 (d, *J* = 7.2 Hz, 2H, ArH), 7.85 (d, *J* = 7.2 Hz, 2H, ArH), 7.63 (d, *J* = 7.2 Hz, 2H, ArH), 3.70 (d, *J* = 7.8 Hz, 4H, N-CH<sub>2</sub>-), 1.99 (m, 2H, -CH-), 1.48 – 1.27 (m, 16H, -CH<sub>2</sub>-), 0.96 (t, *J* = 7.2 Hz, 6H, -CH<sub>3</sub>), 0.91 (t, *J* = 6.6 Hz, 6H, -CH<sub>3</sub>). <sup>13</sup>C NMR (151 MHz, CDCl<sub>3</sub>) δ 168.34, 167.29, 146.53, 145.07, 142.57, 141.03, 138.25, 137.59, 137.33, 136.93, 135.48, 129.96, 126.60, 123.35, 122.13, 121.21, 118.62, 114.24, 108.03, 42.43, 38.16, 30.50, 28.49, 23.84, 23.08, 14.09, 10.43.

### Synthesis of compound 4

<sup>1</sup>H NMR (600 MHz, Chloroform-*d*) δ 9.00 (d, *J* = 0.6 Hz, 1H, ArH), 8.31 (s, 1H, ArH), 8.08 (d, *J* = 1.2 Hz, 1H, ArH), 8.04 (d, *J* = 1.2 Hz, 1H, ArH), 7.82 (d, *J* = 8.4 Hz, 1H, ArH), 7.65 (dd, *J* = 7.8, 1.8 Hz, 1H, ArH), 3.67 (d, *J* = 7.2 Hz, 2H, -N-CH<sub>2</sub>-), 1.90 – 1.86 (m, 1H, -CH-), 1.41 – 1.25 (m, 8H, -CH<sub>2</sub>-), 0.95 (t, *J* = 7.8 Hz, 3H, -CH<sub>3</sub>), 0.90 (t, *J* = 7.2 Hz, 3H, -CH<sub>3</sub>).

### Synthesis of F17

Compound **4** (200 mg, 0.42 mmol), hexabutyltin (67 mg, 0.21 mmol), Pd(PPh<sub>3</sub>)<sub>4</sub> (24 mg, 0.021 mmol), and 15 mL dry toluene were added to a round bottom flask under nitrogen atmosphere. The reaction was heated to 115 °C for 2 h. The reaction was cooled to room temperature and the solvent was removed under a reduced pressure. The crude product was purified through column chromatography (SiO<sub>2</sub>, PE/DCM, 2/1, V/V) to afford **F17** (84 mg, 49.1%) as a yellow solid. <sup>1</sup>H NMR (600 MHz, Chloroform-*d*) δ 8.93 (s, 2H, ArH), 8.28 (s, 2H, ArH), 8.09 (s, 2H, ArH), 8.01 (s, 2H, ArH), 7.90 (d, *J* = 7.2 Hz, 2H, ArH), 7.61 (d, *J* = 7.2 Hz, 2H, ArH), 3.66 (d, *J* = 7.2 Hz, 4H, -N-CH<sub>2</sub>-), 1.89 (m, 2H, -CH-), 1.44 – 1.27 (m, 16H, -CH<sub>2</sub>-), 0.95 (t, *J* = 7.2 Hz, 6H, -CH<sub>3</sub>), 0.90 (t, *J* = 6.6 Hz, 6H, -CH<sub>3</sub>). <sup>13</sup>C NMR (151 MHz, CDCl<sub>3</sub>) δ 168.70, 168.58, 146.35, 144.37, 139.20, 137.81, 137.20, 136.54, 135.48, 130.81, 130.77, 129.62, 127.85, 123.36, 122.93, 122.33, 118.55, 115.11, 114.89, 42.11, 38.51, 30.57, 28.56, 23.90, 23.01, 14.08, 10.46.

## Device Fabrication

A bottom-gate/top-contact (BG/TC) transistor device is fabricated in this study. Highly n-doped silicon (100) wafers with a 300 nm SiO<sub>2</sub> dielectric layer (areal capacitance = 10 nF/cm<sup>2</sup>) were used as substrates. Prior to device fabrication, the wafers were exposed to UV/ozone for 1 hour. Subsequently, a self-assembled monolayer of n-octadecyltrichlorosilane (ODTS) was deposited onto the dielectric layer by spin-coating in its precursor solution (15 μL of ODTS in 15 mL of trichloroethylene) in a glovebox at 3000 rpm for 10 s to ensure more optimized charge transport properties. Note that chemical reaction between ODTS and SiO<sub>2</sub> is accelerated by the presence of NH<sub>3</sub> gas and proceeds for overnight, followed by ultrasonication with toluene for 15 minutes to remove residual chemicals. Prior to the deposition of the active layer, the ODTS-modified wafers were partially covered with polydimethylsiloxane (PDMS) and subjected to an 8-minute plasma treatment to form a hydrophilic boundary. Precursor solutions of **F16** and **F17** were prepared with chloroform (5 mg/mL) and stirred for 4.5 hours in a glovebox. Before spin-coating, the precursor solutions were filtered using a 0.22 μm filter. Polymer films of **F16** and **F17** were prepared by spin-coating the precursor solutions at 1000 rpm for 60 s in a glovebox, followed by annealing at specific temperatures (100 °C, 150 °C, or 200 °C) for 30 minutes. Finally, top-contact gold electrodes were deposited by thermal evaporation through a shadow mask with channel length (*L*) and width (*W*) of 50 μm and 1000 μm, respectively. Characterization of the performance of FETs was recorded in a glovebox using a Keithley 4200-SCS semiconductor parameter analyzer (Keithley Instruments Inc.).

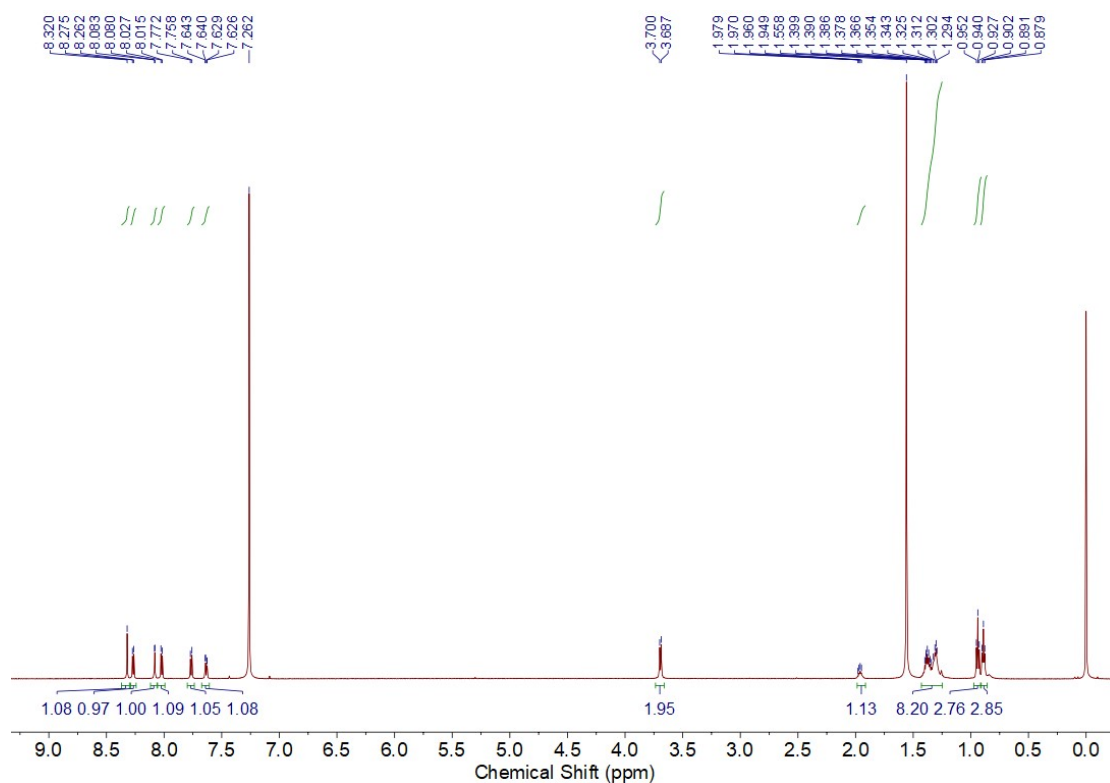

**Fig. S1**  $^1\text{H}$  NMR spectrum of compound **2**, conducted in  $\text{CDCl}_3$

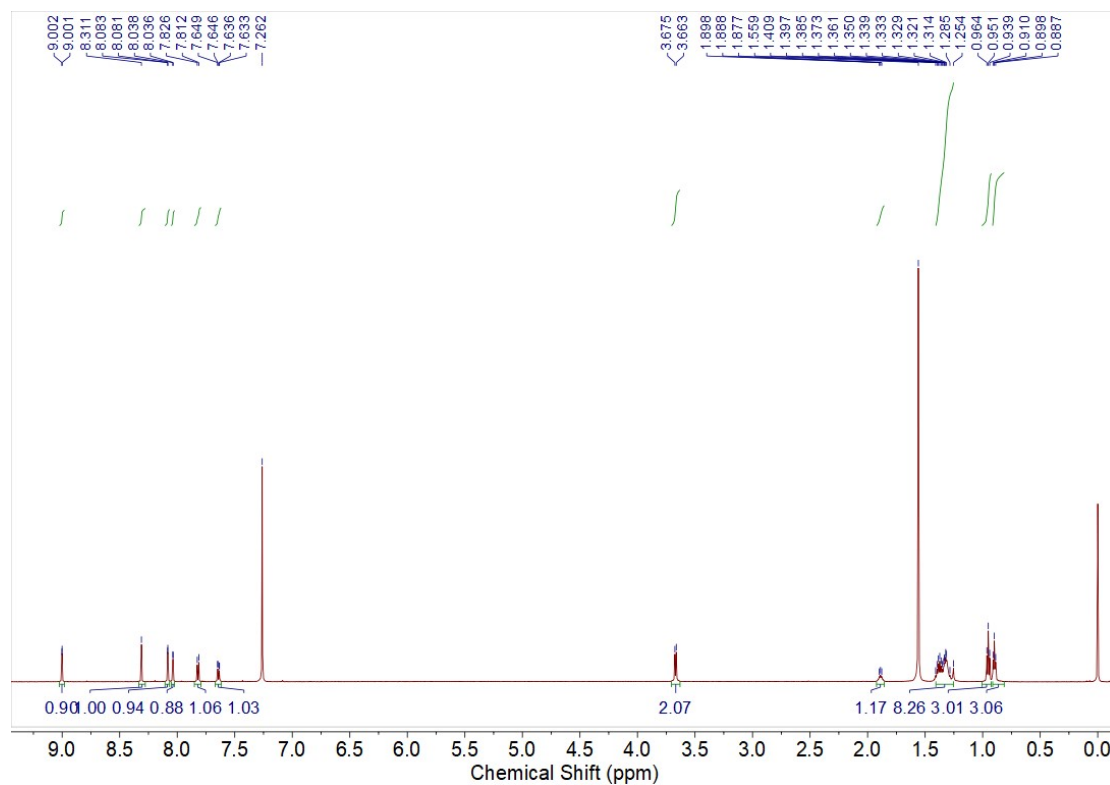

**Fig. S2**  $^1\text{H}$  NMR spectrum of compound **4**, conducted in  $\text{CDCl}_3$ .

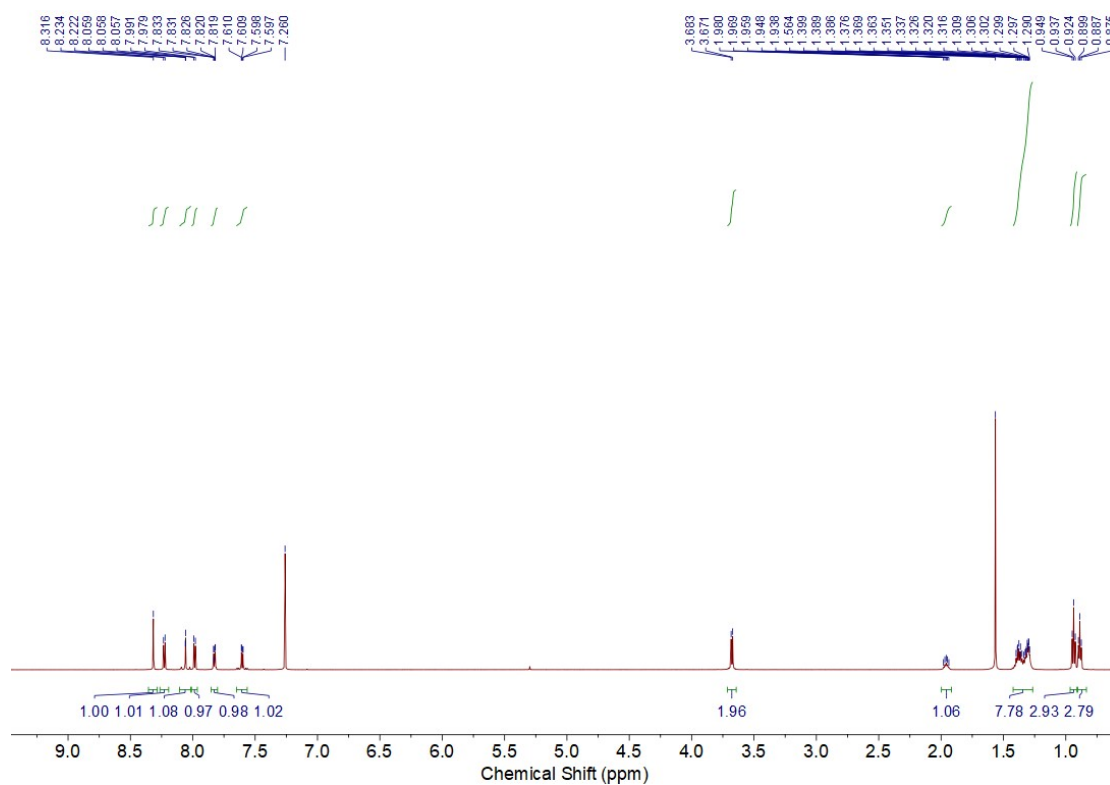

**Fig. S3** <sup>1</sup>H NMR spectrum of compound **F16**, conducted in CDCl<sub>3</sub>.

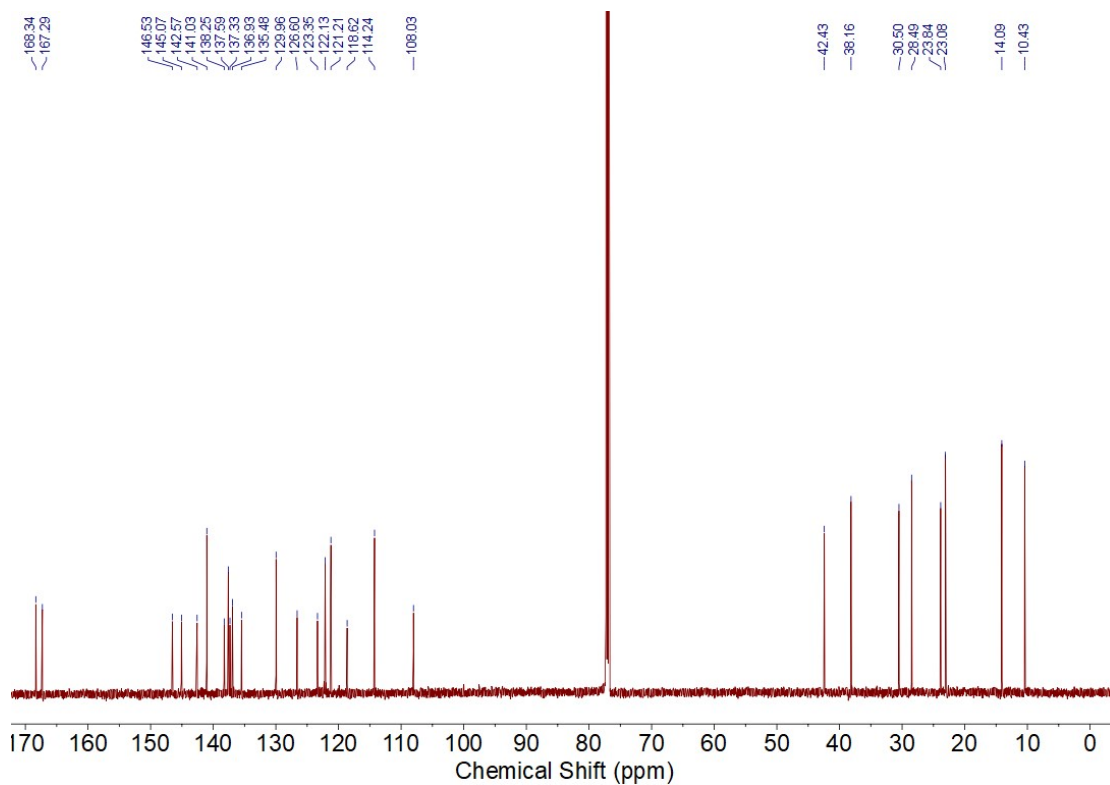

**Fig. S4** <sup>13</sup>C NMR spectrum of compound **F16**, conducted in CDCl<sub>3</sub>.

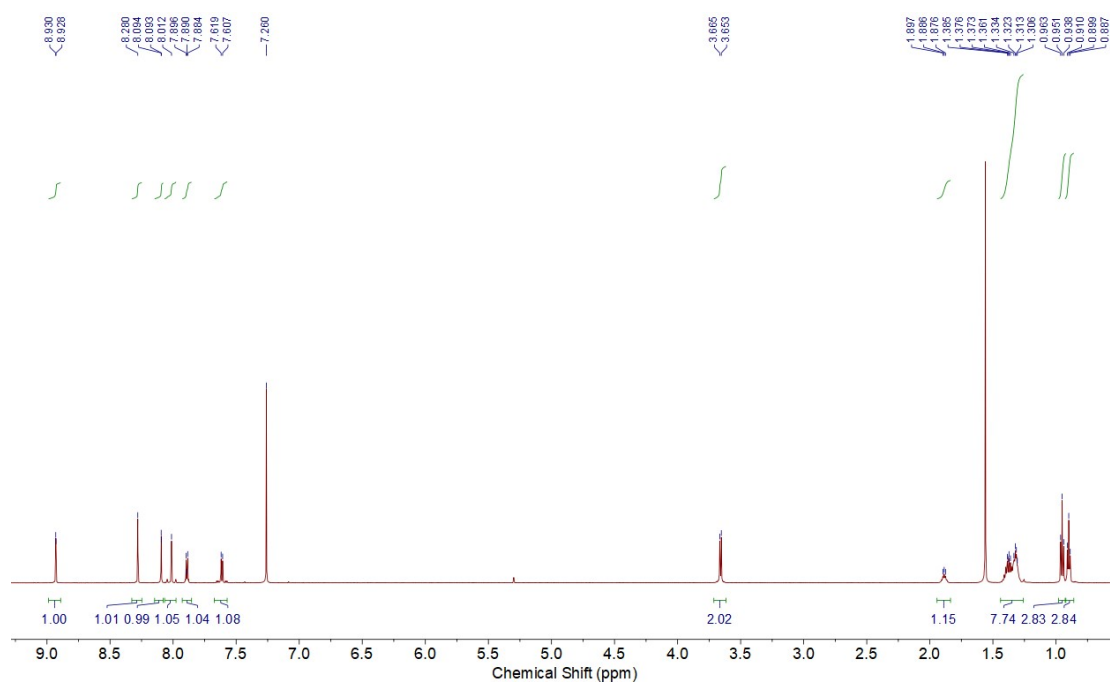

**Fig. S5** <sup>1</sup>H NMR spectrum of compound **F17**, conducted in CDCl<sub>3</sub>.

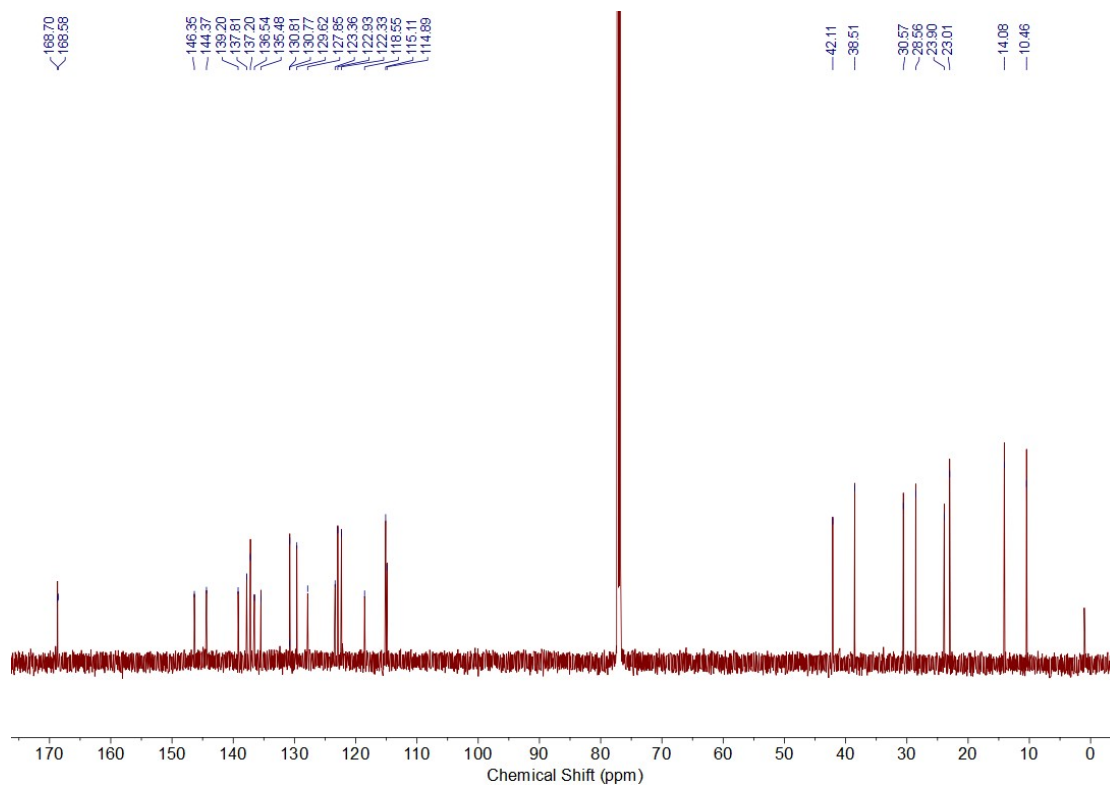

**Fig. S6** <sup>13</sup>C NMR spectrum of compound **F17**, conducted in CDCl<sub>3</sub>.

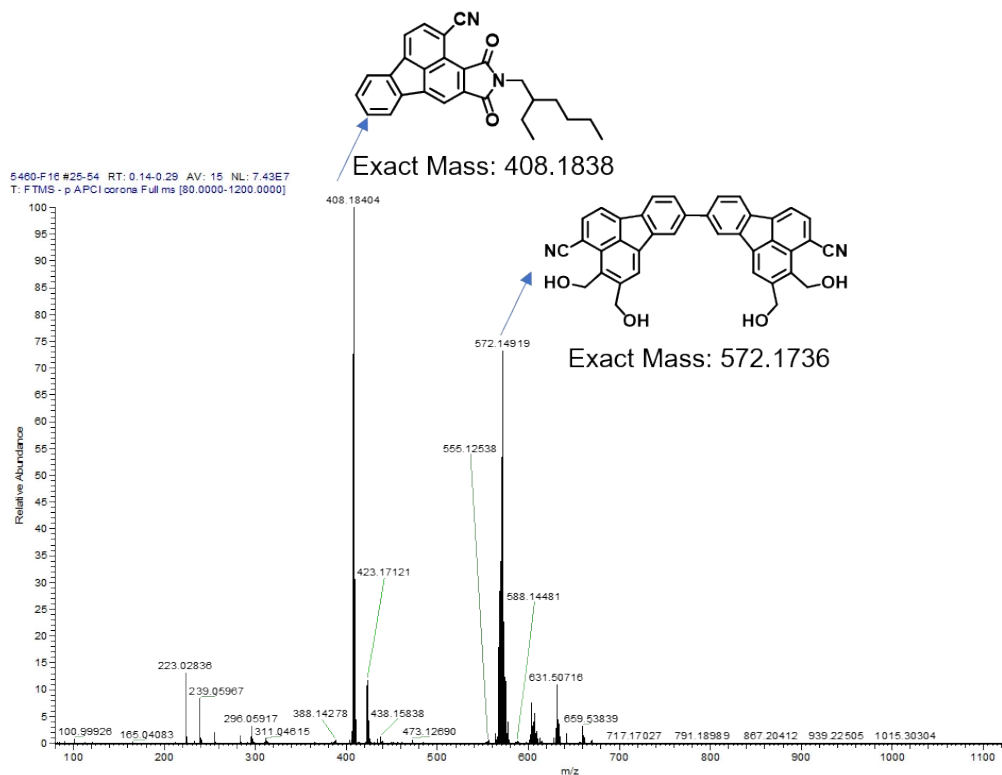

Fig. S7 HR-mass spectrum of F16.

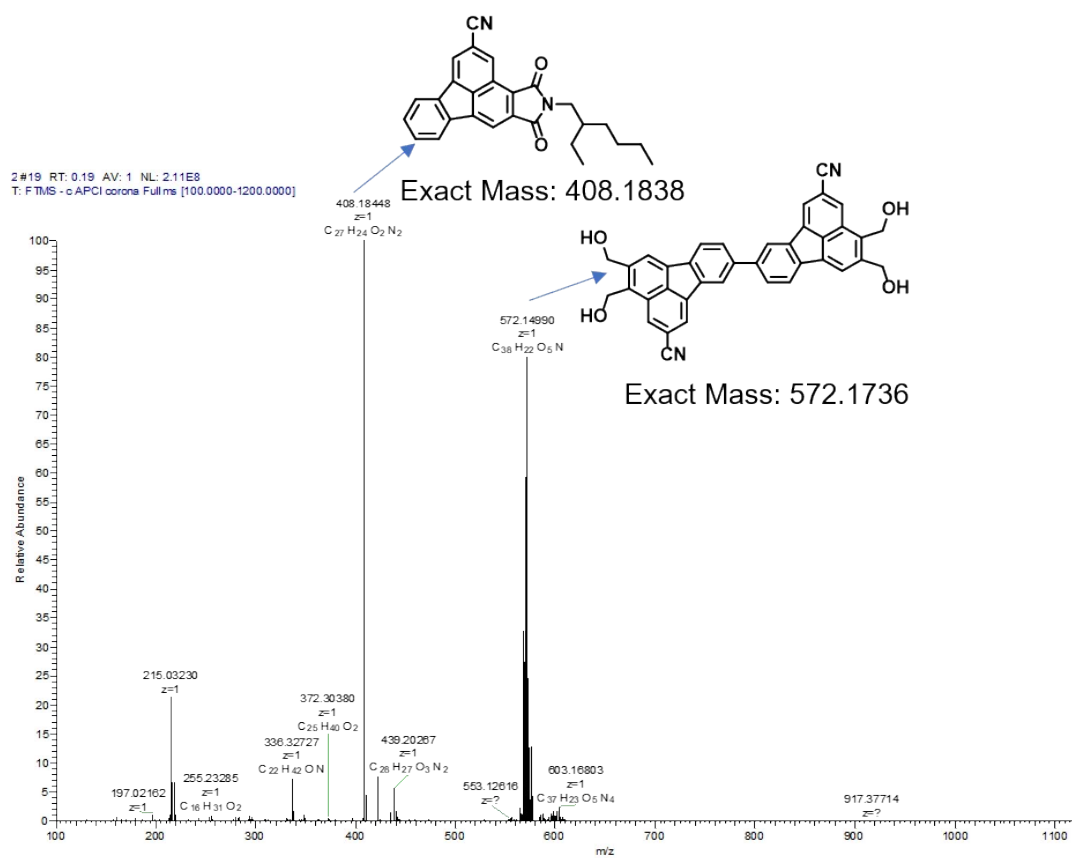

Fig. S8 HR-mass spectrum of F17.

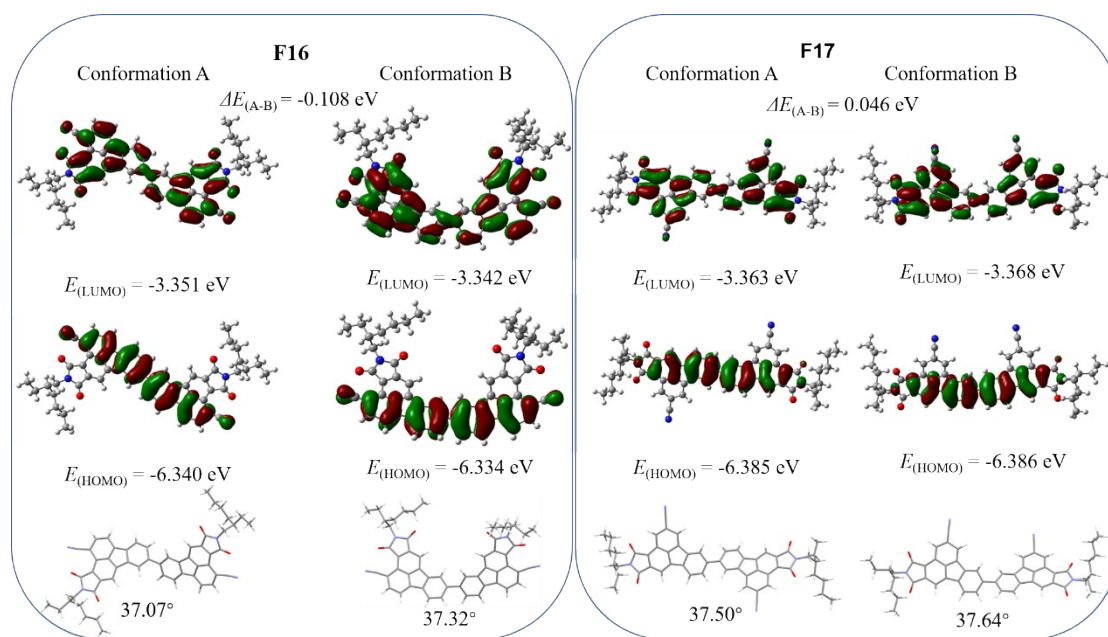

**Fig. S9** Calculated HOMO-LUMO and molecular geometries of **F16** and **F17** with different conformations.

**Table S1.** Summary of calculated data for the different conformations of **F16** and **F17** shown in **Fig. S9**.

| Isomers      | Total Energy<br>(hartree) | Dipole Moment<br>(Debye) | Dihedral Angles<br>(Degree) | HOMO<br>(eV) | LUMO<br>(eV) |
|--------------|---------------------------|--------------------------|-----------------------------|--------------|--------------|
| <b>F16-A</b> | -2605.819387              | 2.30                     | 37.07                       | -3.351       | -6.340       |
| <b>F16-B</b> | -2605.815418              | 6.03                     | 37.32                       | -3.342       | -6.334       |
| <b>F17-A</b> | -2605.832093              | 3.29                     | 37.50                       | -3.363       | -6.385       |
| <b>F17-B</b> | -2605.833792              | 8.07                     | 37.64                       | -3.368       | -6.386       |

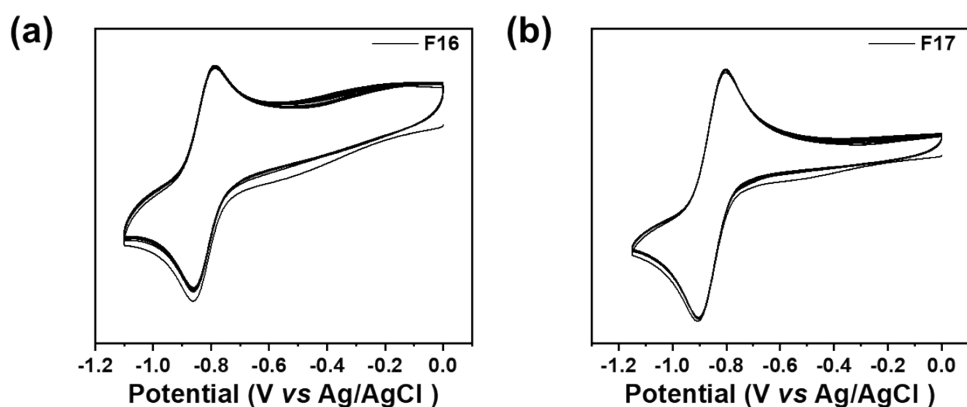

**Fig. S10** Electrochemical stability of **F16** and **F17** under ten cycles of CV tests.

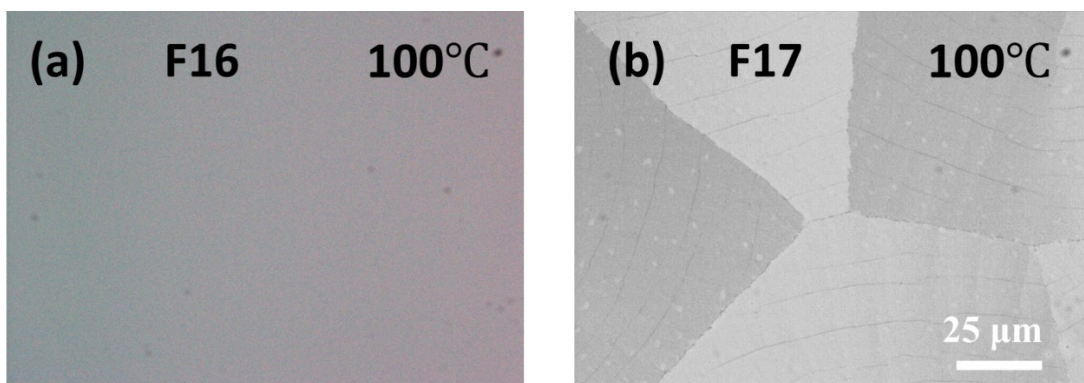

**Fig. S11** OM images of (a) **F16** and (b) **F17** films annealed at 100 °C. The scale bar is 25  $\mu\text{m}$ .

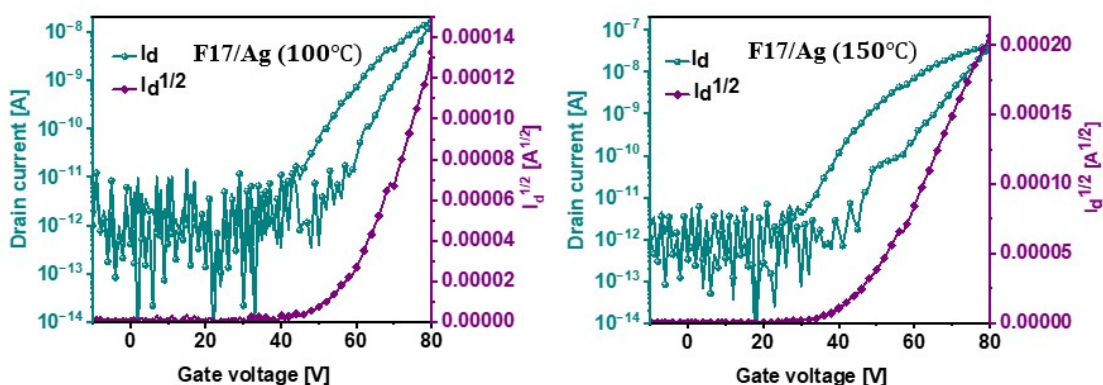

**Fig. S12** FET transfer characteristics of **F17** device using Ag as electrodes annealed at (left) 100 °C and (right) 150 °C. All experiment were performed at  $V_{DS} = 80$  V.

**Table S2.** Summary of **F17** FET devices using Ag as electrodes.

| Material   | Annealed<br>(°C) | Max mobility<br>(cm <sup>2</sup> V <sup>-1</sup> s <sup>-1</sup> ) | Avg. mobility<br>(cm <sup>2</sup> V <sup>-1</sup> s <sup>-1</sup> ) | On/Off<br>ratio        | $V_{th}$<br>(V) |
|------------|------------------|--------------------------------------------------------------------|---------------------------------------------------------------------|------------------------|-----------------|
| <b>F17</b> | 100              | 6.69 x 10 <sup>-4</sup>                                            | 4.61 x 10 <sup>-4</sup>                                             | 2.84 x 10 <sup>6</sup> | 57.94           |
|            | 150              | 6.95 x 10 <sup>-4</sup>                                            | 5.14 x 10 <sup>-4</sup>                                             | 6.80 x 10 <sup>6</sup> | 51.02           |
